# Supplementary material for: The effects of arbuscular mycorrhizal fungi and root interaction on the competition between Trifolium repens and Lolium perenne
Source: PeerJ. 2017 Dec 20;5:e4183. doi: 10.7717/peerj.4183 (PMC5741977; doi:10.7717/peerj.4183)
Supplement: Supplemental Information 5 [file peerj-05-4183-s005.xlsx]

## Sheet: Data
Plot	Treatment	A	R	Ratio	Shoot biomass of T. repens (g)	Shoot biomass of L. perenne (g)	Root biomass of T. repens (g)	Root biomass of L. perenne (g)	RYind of T. repens	RYind of L. perenne	RYTs	N% of T. repensshoot	N% of L. perenneshoot	P% of T. repensshoot	P% of L. perenneshoot	M% of T. repens	M% of L. perenne
24	A1R0T0L8	1	0	1	0	17.163		5.06286		1.07152	1.07152		3.05				0.1
25	A1R0T0L8	1	0	1	0	17.478		5.18743		1.09119	1.09119		2.82		0.628263		0.18
29	A1R0T0L8	1	0	1	0	14.881		4.59886		0.929052	0.929052		3.55		0.561212		0.2
67	A1R0T0L8	1	0	1	0	15.22		4.44571		0.950217	0.950217		3.36		0.546208		0.04
70	A1R0T0L8	1	0	1	0	15.345		2.944		0.958021	0.958021		4.22		0.63093		0.04
3	A1R0T2L6	1	0	2	2.037	15.451	0.318	3.822	0.54776	1.28618	1.10158	2.95	1.4	0.698908	0.355242	0.54	0.38
4	A1R0T2L6	1	0	2	2.434	13.288	0.626	5.6256	0.654516	1.10613	0.993227	3.54	1.97	0.800414	0.673153	0.42	0.15
13	A1R0T2L6	1	0	2	2.463	13.803	0.412	3.576	0.662314	1.149	1.02733	3.32	1.79	0.511312		0.29	0.16
27	A1R0T2L6	1	0	2	1.948	13.859	0.604	3.9432	0.523828	1.15366	0.996204	2.78	1.35	0.782492	0.657286	0.6	0.1
52	A1R0T2L6	1	0	2	3.717	14.748	0.4726	4.7712	0.999521	1.22766	1.17063	3.27	2.74	0.791036	0.388795	0.54	0.5
66	A1R0T2L6	1	0	2	2.551	13.621	0.5	3.726	0.685978	1.13385	1.02188	3.18	1.24	0.552209	0.405129	0.5	0.26
77	A1R0T2L6	1	0	2	3.022	13.75	0.532	3.0036	0.812632	1.14459	1.0616	4.06	2.14			0.32	0.14
80	A1R0T2L6	1	0	2	4.328	15.272	0.5	4.4112	1.16382	1.27128	1.24442	4.14	1.59	0.859636	0.317745	0.16	0.23
7	A1R0T4L4	1	0	3	4.706	13.097	0.948	3.57067	0.632734	1.63535	1.13404	3.6	1.44			0.22	0.1
11	A1R0T4L4	1	0	3	5.504	13.402	1.056	3.09067	0.740028	1.67343	1.20673	3.22	2.29	1.19924	0.571407	0.24	0.26
18	A1R0T4L4	1	0	3	4.897	12.123	0.926667	3.65467	0.658415	1.51373	1.08607	3.46	1.46	0.363725	0.362677	0.1	0.34
32	A1R0T4L4	1	0	3	5.223	11.972	1.27133	2.96933	0.702246	1.49487	1.09856	3.29	2.85	0.809311	0.255952	0.16	0.05
43	A1R0T4L4	1	0	3	4.491	12.753	0.865333	7.93333	0.603827	1.59239	1.09811	4.4	2.62	1.2563	0.630925	0.22	0.12
72	A1R0T4L4	1	0	3	5.594	13.009	0.766667	3.30133	0.752128	1.62436	1.18824	2.62	1.51	0.710404	0.662176	0.88	0.22
75	A1R0T4L4	1	0	3	5.591	13.085	1.14253	4.276	0.751725	1.63385	1.19279	2.87	1.7	0.681003	0.677654	0.16	0.44
79	A1R0T4L4	1	0	3	4.912	11.3	0.996	5.22533	0.660432	1.41097	1.0357	3.58	2.82			0.2	0.24
10	A1R0T6L2	1	0	4	8.5	7.906	1.3512	1.65	0.761899	1.97435	1.06501	3.7	2.35	0.789778	0.458304	0.28	0.16
16	A1R0T6L2	1	0	4	7.419	10.29	1.4076	1.784	0.665003	2.56971	1.14118	3.59	2.38	0.600053	0.733523	0.72	0.36
17	A1R0T6L2	1	0	4	7.202	10.053	1.0368	1.316	0.645552	2.51052	1.11179	4.92	3.74	1.0107	0.292771	0.3	0.16
19	A1R0T6L2	1	0	4	8.486	8.82	1.7256	2.27	0.760644	2.2026	1.12113	3.66	1.35	0.63818	0.448687	0.32	0.18
28	A1R0T6L2	1	0	4	8.196	8.743	1.72512	1.706	0.73465	2.18338	1.09683	3.18	1.66	0.468295	0.683882	0.8	0.26
30	A1R0T6L2	1	0	4	7.653	8.38	1.4196	1.668	0.685978	2.09272	1.03766	4.71	3.2	0.423767	0.719823	0.46	0.22
31	A1R0T6L2	1	0	4	8.831	6.43	1.6704	1.808	0.791568	1.60575	0.995115	4.2	2.93	0.60261	0.468547	0.72	0.42
68	A1R0T6L2	1	0	4	8.861	9.251	1.9068	2.568	0.794257	2.31024	1.17325	3.5	2.88	0.482739	0.510752	0.22	0.22
1	A1R0T8L0	1	0	5	15.269	0	2.60457		1.02648		1.02648	3.79				0.52
5	A1R0T8L0	1	0	5	13.447	0	2.91429		0.903993		0.903994	4.44		0.305541		0.34
12	A1R0T8L0	1	0	5	14.251	0	2.66514		0.958043		0.958044	3.31		0.480697		0.16
41	A1R0T8L0	1	0	5	15.454	0	2.25371		1.03892		1.03892	4.7		0.433735		0.68
42	A1R0T8L0	1	0	5	14.985	0	3.34743		1.00739		1.00739	3.15		0.799418		0.48
78	A1R0T8L0	1	0	5	16.592	0	2.62629		1.11542		1.11542	3.86				0.5
93	A1R0T8L0	1	0	5	14.067	0	3.30971		0.945673		0.945674	3.13		0.288238		0.32
94	A1R0T8L0	1	0	5	14.936	0	3.15657		1.00409		1.00409	3.35		0.818558		0.34
20	A1R1T0L8	1	1	1	0	15.659		7.36114		1.01997	1.01997		2.93				0.12
21	A1R1T0L8	1	1	1	0	15.69		6.36		1.02199	1.02199		3.82		0.375443		0.16
26	A1R1T0L8	1	1	1	0	14.294		8.36891		0.93106	0.93106		2.97		0.683832		0.02
64	A1R1T0L8	1	1	1	0	15.224		7.26629		0.991636	0.991636		4.07		0.746475		0.16
74	A1R1T0L8	1	1	1	0	15.895		8.37714		1.03534	1.03534		2.59		0.426395		0.1
6	A1R1T2L6	1	1	2	5.851	14.293	0.228	5.586	1.80709	1.24133	1.38277	3.63	1.56		0.695355	0.22	0.1
23	A1R1T2L6	1	1	2	0.516	14.647	0.154	9.1956	0.159367	1.27207	0.993895	3.6	1.27		0.379986	0.39	0.02
51	A1R1T2L6	1	1	2	1.539	14.374	0.302	6.0084	0.475323	1.24836	1.0551	3.35	2.89		0.311944	0.38	0.1
65	A1R1T2L6	1	1	2	0.85	15.088	0.156	5.988	0.262524	1.31037	1.04841	2.63	1.95		0.725694	0.4	0.14
76	A1R1T2L6	1	1	2	1.419	15.063	0.348	9.1248	0.438261	1.3082	1.09071	3.42	2.7		0.577919	0.56	0.15
2	A1R1T4L4	1	1	3	2.098	14.367	0.386667	6.34	0.323985	1.87163	1.09781	3.39	2.52	0.58802	0.642333	0.2	0.2
15	A1R1T4L4	1	1	3	2.49	12.714	0.754667	4.93867	0.38452	1.65629	1.0204	3.07	1.68	0.279307		0.3	0.1
22	A1R1T4L4	1	1	3	1.381	14.829	0.502667	3.04267	0.213262	1.93182	1.07254	3.82	2.71		0.707822	0.52	0.25
44	A1R1T4L4	1	1	3	2.561	15.009	0.629333	5.72133	0.395485	1.95526	1.17537	3.24	2.96	0.308775	0.666723	0.32	0.21
73	A1R1T4L4	1	1	3	2.995	12.206	0.636	3.97333	0.462505	1.59011	1.02631	3.32	1.5	0.805268	0.276805	0.38	0.28
14	A1R1T6L2	1	1	4	4.162	10.916	1.4472	4.546	0.42848	2.84412	1.03239	4.27	3.28	0.449529	0.566949	0.32	0.2
53	A1R1T6L2	1	1	4	4.26	11.156	1.4928	4.29	0.438569	2.90665	1.05559	3.57	2.15	0.598766		0.3	0.24
54	A1R1T6L2	1	1	4	4.502	12.817	1.0068	3.85	0.463483	3.33941	1.18247	4.02	2.96	0.453459	0.239383	0.08	0.52
69	A1R1T6L2	1	1	4	4.766	12.185	0.9996	3.772	0.490662	3.17475	1.16168	3.63	1.66		0.698464	0.44	0.42
71	A1R1T6L2	1	1	4	5.732	10.042	1.2936	3.75	0.590113	2.6164	1.09668	3.57	3.02	1.09944	0.581959	0.48	0.36
8	A1R1T8L0	1	1	5	12.375	0	3.21143		0.95551		0.95551	3.64				0.68
9	A1R1T8L0	1	1	5	13.677	0	3.24914		1.05604		1.05604	3.83				0.62
55	A1R1T8L0	1	1	5	12.852	0	3.04571		0.99234		0.99234	2.95		0.957238		0.28
56	A1R1T8L0	1	1	5	13.372	0	3.23429		1.03249		1.03249	3.51				0.12
95	A1R1T8L0	1	1	5	12.48	0	4.22857		0.963617		0.963617	3.46				0.4
33	A0R0T0L8	0	0	1	0	18.335		4.85714		1.15687	1.15687		2.59		0.571889
35	A0R0T0L8	0	0	1	0	15.124		4.58629		0.954268	0.954268		2.82		0.577949
37	A0R0T0L8	0	0	1	0	14.543		5.63314		0.917609	0.917609		3.14
83	A0R0T0L8	0	0	1	0	15.277		4.29829		0.963922	0.963922		3.32		0.318748
117	A0R0T0L8	0	0	1	0	15.965		4.91886		1.00733	1.00733		2.65
46	A0R0T2L6	0	0	2	2.799	14.798	0.5	4.5504	0.729248	1.24493	1.11601	3.76	2.91	0.412693	0.833704
62	A0R0T2L6	0	0	2	2.103	13.344	0.4072	3.8292	0.547913	1.12261	0.978937	4.08	2.51		0.634667
63	A0R0T2L6	0	0	2	3.564	17.195	0.696	5.8248	0.92856	1.44659	1.31708	3.33	2.33
105	A0R0T2L6	0	0	2	2.618	14.496	0.406	3.1212	0.682091	1.21952	1.08517	3.45	2.67	1.2799
112	A0R0T2L6	0	0	2	2.819	14.847	0.832	4.1592	0.734459	1.24905	1.12041	4.62	2.72	0.233735
116	A0R0T2L6	0	0	2	3.534	15.119	0.764	4.4724	0.920744	1.27194	1.18414	3.3	2.63	0.629118	0.513529
122	A0R0T2L6	0	0	2	2.671	14.73	0.5596	3.9492	0.695899	1.23921	1.10338	3.37	2.26		0.386348
123	A0R0T2L6	0	0	2	2.7	14.05	0.456	4.698	0.703455	1.182	1.06237	3.26	2.53	0.542054
36	A0R0T4L4	0	0	3	4.806	13.229	1.35467	3.212	0.626075	1.6694	1.14774	3.55	2.96	0.609211
49	A0R0T4L4	0	0	3	5.184	10.875	1.452	2.212	0.675317	1.37234	1.02383	3.22	2.9	0.516418	0.538294
58	A0R0T4L4	0	0	3	4.581	11.548	1.06133	3.72	0.596764	1.45727	1.02702	3.27	2.58	0.593302	0.220958
97	A0R0T4L4	0	0	3	8.154	10.11	0.910667	2.72667	1.06222	1.27581	1.16902	3.38	2.75	0.591254
100	A0R0T4L4	0	0	3	5.274	12.419	0.701333	3.276	0.687041	1.56718	1.12712	3	2.86	0.522628
107	A0R0T4L4	0	0	3	6.6	13.69	2.808	3.68	0.859778	1.72758	1.29368	3.2	1.52	0.644564
109	A0R0T4L4	0	0	3	5.43	13.997	1.30667	6.196	0.707363	1.76632	1.23684	4.4	1.39
120	A0R0T4L4	0	0	3	4.049	12.263	0.902667	4.64	0.527461	1.5475	1.03748	3.74	1.88		0.303098
34	A0R0T6L2	0	0	4	9.196	8.531	2.3016	1.32	0.798638	2.1531	1.13726	3.36	2.3		0.631355
40	A0R0T6L2	0	0	4	1.859	9.693	1.3236	1.304	0.161447	2.44637	0.732679	3.2	2.07	0.722513	0.364756
45	A0R0T6L2	0	0	4	10.246	8.524	1.746	2.516	0.889827	2.15133	1.20521	4.19	3.12	0.433073	0.406435
57	A0R0T6L2	0	0	4	8.945	7.332	1.932	1.66	0.77684	1.85049	1.04526	4.2	2.37	0.559682	0.513514
59	A0R0T6L2	0	0	4	9.233	9.672	1.4256	1.614	0.801852	2.44107	1.21166	2.11	1.57	0.8802	0.754963
86	A0R0T6L2	0	0	4	9.407	9.18	1.656	2.146	0.816963	2.31689	1.19195	3.54	3.08	0.321859	0.265275
96	A0R0T6L2	0	0	4	10.099	7.633	3.4128	1.22	0.87706	1.92645	1.13942	3.3	1.97	0.116467	0.572055
121	A0R0T6L2	0	0	4	8.197	7.246	1.6704	1.524	0.711879	1.82878	0.991112	3.57	2.46		0.694414
38	A0R0T8L0	0	0	5	15.356	0	3.09486		1.00021		1.00022	3.66
61	A0R0T8L0	0	0	5	15.34	0	4.40343		0.999166		0.999179	3.11		0.145078
106	A0R0T8L0	0	0	5	15.396	0	2.26743		1.00281		1.00283	3.11
113	A0R0T8L0	0	0	5	15.486	0	2.34057		1.00868		1.00869	3.01
114	A0R0T8L0	0	0	5	15.355	0	3.57486		1.00014		1.00016	2.99		0.304109
115	A0R0T8L0	0	0	5	15.745	0	2.66286		1.02555		1.02556	2.78		0.34671
118	A0R0T8L0	0	0	5	16.163	0	2.47771		1.05277		1.05279	3.95		0.603667
119	A0R0T8L0	0	0	5	13.98	0	2.09714		0.910583		0.910595	2.14		0.661461
48	A0R1T0L8	0	1	1	0	15.255		6.688		1.00589	1.00589		3.33
88	A0R1T0L8	0	1	1	0	14.65		7.64		0.966002	0.966002		2.7
98	A0R1T0L8	0	1	1	0	15.374		8.968		1.01374	1.01374		3.11		0.63542
99	A0R1T0L8	0	1	1	0	14.974		7.43657		0.987366	0.987366		3.68
102	A0R1T0L8	0	1	1	0	15.575		7.91657		1.027	1.027		4.9
39	A0R1T2L6	0	1	2	1.278	15.315	0.348	5.1192	0.372242	1.34647	1.10291	4.24	3.61
47	A0R1T2L6	0	1	2	0.852	16.635	0.344	6.3144	0.248161	1.46252	1.15893	2.63	1.87	0.511644	0.563053
60	A0R1T2L6	0	1	2	0.703	13.675	0.126	6.8016	0.204762	1.20228	0.952902	3.51	2.39	0.498548	0.315447
101	A0R1T2L6	0	1	2	1.105	14.326	0.254	6.372	0.321852	1.25952	1.0251	4.03	1.39	0.100628
124	A0R1T2L6	0	1	2	0.983	15.345	0.212	6.996	0.286318	1.34911	1.08341	3.17	1.41	2.06905	0.126675
50	A0R1T4L4	0	1	3	1.857	13.848	0.542667	6.256	0.270443	1.82624	1.04834	4.74	2.9	0.83366	0.288816
87	A0R1T4L4	0	1	3	4.29	11.967	0.641333	3.836	0.624772	1.57818	1.10147	3.27	1.43	0.712305	0.245991
89	A0R1T4L4	0	1	3	3.242	13.624	0.646667	5.316	0.472147	1.7967	1.13442	4.46	1.56	1.20916	0.529392
104	A0R1T4L4	0	1	3	2.395	14.427	0.613333	5.788	0.348795	1.9026	1.1257	3.73	1.23	1.1213	0.562385
110	A0R1T4L4	0	1	3	5.359	14.263	0.637333	5.07333	0.780456	1.88097	1.33071	4.5	1.31	0.691205	0.851177
82	A0R1T6L2	0	1	4	5.247	11.225	1.4628	3.736	0.50943	2.96065	1.12223	2.2	1.98	0.331291	0.584605
85	A0R1T6L2	0	1	4	5.54	10.3	1.8852	3.94	0.537877	2.71667	1.08258	2.42	1.72	0.620002	0.589988
90	A0R1T6L2	0	1	4	3.702	11.172	0.6744	5.508	0.359426	2.94667	1.00624	3.44	1.6	0.614757	0.463433
91	A0R1T6L2	0	1	4	4.095	12.12	1.2756	2.472	0.397582	3.19671	1.09736	3.56	3.02	0.684184
108	A0R1T6L2	0	1	4	6.165	10.09	1.044	4.054	0.598558	2.66129	1.11424	2.39	1.74	0.440551	0.33602
81	A0R1T8L0	0	1	5	12.746	0	3.50857		0.928129		0.928129	3.53
84	A0R1T8L0	0	1	5	13.848	0	3.032		1.00837		1.00837	3.9		0.349873
92	A0R1T8L0	0	1	5	13.437	0	3.81143		0.978446		0.978446	3.39
103	A0R1T8L0	0	1	5	14.5	0	2.92571		1.05585		1.05585	2.84		0.34995
111	A0R1T8L0	0	1	5	14.134	0	4.28		1.0292		1.0292	2.69		0.574777

## Sheet: Abbreviation
			A0	-AMF
			A1	+AMF
			R0	-Root
			R1	+Root
			T	Trifolium repens
			L	Lolium perenne
			Ratios	Planting ratios of T. repens and L. perenne
			Ratios=1	T:L=0:8
			Ratios=2	T:L=2:6
			Ratios=3	T:L=4:4
			Ratios=4	T:L=6:2
			Ratios=5	T:L=8:0
			RYind	relative shoot biomass per individual
			RYTs	Relative yield totals
			N%	Nitrogen concentration based on shoot dry matter
			P%	Phosphorus concentration based on shoot dry matter
			M%	AMF root colonization
